# Supplementary material for: The Arizona Genetic Counseling Landscape: Exploring the Impact of a Limited Genetic Counseling Workforce
Source: Research Square preprint supplement (doi:10.21203/rs.3.rs-6607449/v1), 2025-05-22
Supplement: Supplementary file 1 [file 9d990c4f132454878cceb6fb.docx]

Appendix A: Survey

**Start of Block: Default Question Block**

Q1 What is your genetic counseling board certification status?

- Board certified
- Board eligible, not board certified
- Not board certified, not board eligible

Q2 How many years have you been a practicing genetic counselor?

- N/A
- <1 year
- 1-4 years
- 5-9 years
- 10-14 years
- 15-19 years
- 20-24 years
- 25 or more years

Q3 Did you live in Arizona prior to attending a genetic counseling graduate program?

- Yes
- No

Q5 How would you describe yourself? (select all that apply)

- White
- Asian
- Hispanic or Latinx
- Middle Eastern or North African
- Black, African American, or of African descent
- American Indian, Alaskan Native, or Indigenous Peoples of Canada
- Native Hawaiian or other Pacific Islander
- Other
- Prefer not to answer

Q6 What is your current gender identity?

- Male
- Female
- Non-binary / third gender
- Transgender female
- Transgender male
- Prefer not to say

Q7 What is your age?

- 20-29
- 30-39
- 40-49
- 50-59
- 60-69
- 70 or older
- Prefer not to say

Q8 Do you consider yourself to be part of a disability community?

- Yes
- No
- Prefer not to say

Q9 What genetic specialty are you currently practicing in? (Select all that apply)

- Adult cancer genetics
- Prenatal
- Pediatrics
- Laboratory sciences
- Neurogenetics
- Genomic medicine
- Cardiology
- Preimplantation genetics testing, ART/IVF, or infertility
- Preconception/ Reproductive screening
- Metabolic disease
- General adult genetics
- Pediatric cancer genetics
- Ophthalmology
- Consumer genomics/ personal genomics
- Hematology
- Newborn screening
- Public health
- Psychiatric

Q38 In your current role, what type of organization employs you?

- Hospital/Medical facility- Academic Medical Center
- Laboratory- commercial
- Hospital/medical facility-public
- Hospital/medical facility- private
- Private company: telegenetics/consulting
- University, college, or training program
- Not for profit organization
- Government organization or agency
- Physician's private practice
- Laboratory- non- commercial
- Private company: biotech or research
- Private company: digital health or software
- Private company: pharmaceutical
- Self-employed or private practice
- Insurance company/ benefit management company
- Other (write-in)

Q39 Does the organization that employs you have a career ladder for genetic counselors?

- Yes
- No
- Unsure

Q40 Does the organization that employs you reimburse professional dues or other related costs, such as attendance of genetic counseling conferences?

- Yes, in full
- Yes, partially
- No
- Unsure

Q41 How many days of PTO do you receive per year?

- Vacation only (write-in)
- Sick only (write-in)
- Total (write-in)

Q42 Is your current role a full-time or part-time position?

- Full-time
- Part-time

Q43 What is your current full-time equivalent (FTE)?

(write-in)

Q44 What is your current annual full-time salary?

(write-in)

Q45 In your current role, did you receive any of the following training? (select all that apply)

- EMR training
- Institutional policies, rules, and compliance
- Shadowing of another genetic counselor
- Formal training on written genetic counseling specific institutional policies

Q46 How long did it take you to feel competent in your current role?

- Less than 3 months
- 3-6 months
- 6-12 months
- More than 12 months

Q47 Do you feel that your workplace has adequate support staff to meet current needs?

- Yes
- No
- Unsure

Q48 Does your workplace employ genetic counseling assistants?

- Yes
- No
- Unsure

Q49 Do you have any support staff other than genetic counseling assistants?

- *Yes*
- No
- Unsure

*Display This Question:*

*If Do you have any support staff other than genetic counseling assistants? = Yes*

Q50 What type of support staff? (Select all that apply)

- Medical assistant
- Nurse
- Central scheduling
- Administrative assistant
- Centralized insurance team
- Other (write-in)

Q52 At your workplace, who performs each of the following tasks?

|  | Genetic Counselor | Genetic Counseling Assistant | Medical Assistant | Nurse | Central scheduling | Administrative assistant | Central  insurance team | Other | N/A |
| --- | --- | --- | --- | --- | --- | --- | --- | --- | --- |
| Obtainment of records |  |  |  |  |  |  |  |  |  |
| Scheduling of patients |  |  |  |  |  |  |  |  |  |
| Administrative tasks (such as scanning, faxing, copying) |  |  |  |  |  |  |  |  |  |
| Shipping of genetic test kits |  |  |  |  |  |  |  |  |  |
| Contact of patients for additional information |  |  |  |  |  |  |  |  |  |
| Request of prior authorization for genetic testing |  |  |  |  |  |  |  |  |  |
| Triage of new referrals |  |  |  |  |  |  |  |  |  |
| Contact of patients with negative testing results |  |  |  |  |  |  |  |  |  |
| Contact of patients with positive or uncertain testing results |  |  |  |  |  |  |  |  |  |
| Entering genetic test requisition forms |  |  |  |  |  |  |  |  |  |
|  |  |  |  |  |  |  |  |  |  |

Q10 What type of work setting do you currently practice in?

- Predominantly direct patient care
- Predominantly non-direct patient care
- Mixed direct patient care and non-direct patient care

**End of Block: Default Question Block**

**Start of Block: Direct patient care**

Q11 Does your workplace offer telehealth appointments?

- Yes
- Yes, but expected to stop soon
- No
- Not currently, but expected to start soon

Q12 In what physical setting do you currently see patients for in person visits? (Select all that apply)

- Personal work office
- Separate work office
- Consult room
- I do not see patients in person
- Other (write-in)

Q15 What would you estimate is the typical wait time at your workplace for a non-urgent genetics visit?

- 1-3 days
- 4 days-1 week
- 8 days-2 weeks
- 15 days-3 weeks
- 22-29 days
- 1-2 months
- 3-4 months
- 5-6 months
- More than 6 months

Q16 How many patients does one genetic counselor at your workplace in your specialty have the capacity to see in a month, on average?

- Less than 50
- 50-99
- 100-149
- 150-199
- 200-250
- More than 250

Q17 How many patients are genetic counselors at your workplace in your specialty actually seeing per month?

- Less than 50
- 50-99
- 100-149
- 150-199
- 200-250
- More than 250

Q18 At your workplace, what specialties or clinics do not utilize a genetic counselor that you think would benefit from one?

(write-in)

Q19 What type of role is filled by the person who is your direct supervisor or manager?

- Genetic counselor
- Physician
- Nurse
- Administrative staff
- Other (write-in)

Q20 Do you feel like your direct supervisor or manager is able to meet your current needs?

- Yes
- No
- Unsure

Q21 What proportion of your current referrals are self-referrals, external referrals, or internal referrals?

| Percentage | 10 | 20 | 30 | 40 | 50 | 60 | 70 | 80 | 90 | 100 |
| --- | --- | --- | --- | --- | --- | --- | --- | --- | --- | --- |
| Self-referrals |  |  |  |  |  |  |  |  |  |  |
| External |  |  |  |  |  |  |  |  |  |  |
| Internal |  |  |  |  |  |  |  |  |  |  |

Q22 Which reasons for referral do you currently receive, and how frequently?

|  | Never | Rarely | Sometimes | Often |
| --- | --- | --- | --- | --- |
| Patients with a history of a known condition, with no genetic testing performed |  |  |  |  |
| Patients with complex conditions or symptoms, for triage and determination of appropriate genetic testing |  |  |  |  |
| Patients who have already had genetic testing, with initial genetic counseling performed by another provider |  |  |  |  |
| Patients who have already had genetic testing, but no genetic counseling has been performed |  |  |  |  |
| Patients referred in for general education |  |  |  |  |

Q23 Are other non-genetic counseling providers at your workplace providing genetic counseling services (such as ordering genetic testing, providing pre or post-test counseling)?

- *Yes*
- No
- Unsure

*Display This Question:*

*If Are other non-genetic counseling providers at your workplace providing genetic counseling service... = Yes*

Q25 What types of providers are performing genetic counseling services?

- *MD physician*
- Nurse or nurse practitioner
- Midwives
- Other (write-in)

*Display This Question:*

*If What types of providers are performing genetic counseling services? = MD physician*

Q53 What types of MD physicians? (select all that apply)

- Medical geneticist
- Oncologist
- OB/GYN
- Surgeon
- Cardiologist
- Neurologist
- Other (write-in)

Q26 For the internal providers that you receive referrals from, what would you say is their familiarity with genetic counselors and the services they provide?

- Not at all familiar
- Slightly familiar
- Moderately familiar
- Very familiar
- Extremely familiar

Q27 For the external providers that you receive referrals from, what would you say is their familiarity with genetic counselors and the services they provide?

- Not at all familiar
- Slightly familiar
- Moderately familiar
- Very familiar
- Extremely familiar

Q28 Would you say that you receive more, less, or an appropriate number of referrals for patients in the community you serve who would benefit from genetic counseling at your workplace?

- More referrals than are appropriate or necessary
- Less referrals than are appropriate or necessary
- An appropriate number of referrals

Q29 How often would you say that you see patients who have had a genetic test result interpreted incorrectly or inadequately by another provider?

- Never
- Rarely
- Sometimes
- Often

Q30 How often would you say that you see patients who have had prior unnecessary, or inappropriate genetic testing performed?

- Never
- Rarely
- Sometimes
- Often

Q31 How often would you say that you see patients for explanation of testing results that other providers were not able to provide?

- Never
- Rarely
- Sometimes
- Often

Q32 What percentage of your patients would you estimate receive their medical care in a language other than English?

- 0-25%
- 26-50%
- 51-75%
- 76-100%

Q33 Do you see patients that are required by their insurance company to have a visit with a genetics specialist prior to genetic testing?

- *Yes*
- No
- Unsure

*Display This Question:*

*If Do you see patients that are required by their insurance company to have a visit with a genetics... = Yes*

Q34 What insurance companies?

- Cigna
- Tricare
- Other (write-in

Q35 How do genetic counselors at your workplace bill for services?

- CPT codes 99201-99215
- CPT codes 99241-99245
- CPT codes 99354-99355
- CPT codes 99201-99215
- CPT codes 99241-99245
- CPT codes 99354-99355
- Direct patient bill
- Bundled with a physician's fee
- Facility fee
- My workplace does not bill for genetic counseling visits or service
- Unsure
- Other (write-in)

Q36 If you previously worked in a predominantly non-direct patient care role, did you ever transition back to a predominantly direct patient care role?

- I have never worked in a non-direct patient care role
- *Yes*
- No
- Prefer not to say

*Skip To: Q37 If If you previously worked in a predominantly non-direct patient care role, did you ever transition... = Yes*

Q37 Why?

(write-in)

**End of Block: Direct patient care**

**Start of Block: Non-direct patient care**

Q13 How long did you work in a predominantly direct patient care setting before transitioning to a non-direct patient care role?

- I have never worked in a predominantly direct patient care role
- 0-2 years
- 3-5 years
- 6-10 years
- More than 10 years
- Prefer not to say

Q14 Please indicate the importance of the factors that contributed to you choosing a non-direct patient care role.

|  | Not at all important | Low importance | Neutral | Important | Very important |
| --- | --- | --- | --- | --- | --- |
| More opportunities for advancement in non-direct patient care |  |  |  |  |  |
| Salary and benefits |  |  |  |  |  |
| Workload |  |  |  |  |  |
| Ability to work remotely |  |  |  |  |  |
| Sense of value by employer or other healthcare providers |  |  |  |  |  |
| Other |  |  |  |  |  |
